# Supplementary material for: Dissecting of the AI-2/LuxS Mediated Growth Characteristics and Bacteriostatic Ability of Lactiplantibacillus plantarum SS-128 by Integration of Transcriptomics and Metabolomics
Source: MDPI journal article supplement (doi:10.3390/foods11050638), 2022-02-22
Supplement: s1 [file s1]

Supplementary Materials

# Dissecting of the AI-2/LuxS Mediated Growth Characteristics and Bacteriostatic Ability of *Lactiplantibacillus plantarum* SS-128 by Integration of Transcriptomics and Metabolomics

Yilin Qian, Yuan Li, Tengting Xu, Huijuan Zhao, Mingyong Zeng and Zunying Liu \*

College of Food Science and Engineering, Ocean University of China, Qingdao 266003, China; qianyil92@outlook.com (Y.Q.); liyuan@ouc.edu.cn (Y.L.); xtteng924@163.com (T.X.); zhj13583036006@163.com (H.Z.); mingyz@ouc.edu.cn (M.Z.)

\* Correspondence: liuzunying@ouc.edu.cn; Tel./Fax: +86-532-8203-2400

**Table S1.** The mean inhibition zone diameter (mm) of CFS of *L. plantarum* against the *E. coli*, *S. baltica*, *S. aureus* and *A. johnsonii*.

| Time (h) |                      | <i>E. coli</i>          | <i>S. aureus</i>        | <i>S. baltica</i>       | <i>A. johnsonii</i>     |
|----------|----------------------|-------------------------|-------------------------|-------------------------|-------------------------|
| 8        | SS-128               | 9.67±0.07 <sup>e</sup>  | 9.79±0.11 <sup>c</sup>  | 10.41±0.08 <sup>c</sup> | 9.24±0.13 <sup>c</sup>  |
|          | $\Delta$ LuxS/SS-128 | 9.08±0.02 <sup>f</sup>  | 9.84±0.08 <sup>c</sup>  | 10.12±0.14 <sup>f</sup> | 9.19±0.06 <sup>c</sup>  |
| 14       | SS-128               | 13.14±0.15 <sup>b</sup> | 13.77±0.14 <sup>a</sup> | 13.25±0.21 <sup>c</sup> | 14.27±0.05 <sup>b</sup> |
|          | $\Delta$ LuxS/SS-128 | 12.08±0.19 <sup>d</sup> | 13.40±0.05 <sup>b</sup> | 12.96±0.01 <sup>d</sup> | 13.08±0.14 <sup>d</sup> |
| 24       | SS-128               | 13.95±0.03 <sup>a</sup> | 13.68±0.12 <sup>a</sup> | 16.41±0.03 <sup>a</sup> | 14.74±0.06 <sup>a</sup> |
|          | $\Delta$ LuxS/SS-128 | 12.63±0.04 <sup>c</sup> | 13.56±0.14 <sup>a</sup> | 15.18±0.08 <sup>b</sup> | 13.86±0.01 <sup>c</sup> |

Means (n=3) in the same column without a common superscript letter (a-f) are statistically different,  $P < 0.05$ .

**Table S2.** Comparison of statistical results and reference genome.

| Sample        | SS128-1 | SS128-2 | SS128-3 | $\Delta$ luxS/SS128-1 | $\Delta$ luxS/SS128-2 | $\Delta$ luxS/SS128-3 |
|---------------|---------|---------|---------|-----------------------|-----------------------|-----------------------|
| Total_reads   | 6648096 | 8189065 | 8086430 | 8077747               | 7498249               | 7251646               |
| Mapped_reads  | 6253360 | 7708836 | 7613056 | 7620400               | 7078502               | 6851383               |
| Map_PCG_Sn    | 74%     | 67%     | 69%     | 65%                   | 64%                   | 68%                   |
| Map_PCG_At    | 2%      | 2%      | 2%      | 3%                    | 2%                    | 2%                    |
| Map_rRNA_Sn   | 0%      | 0%      | 0%      | 0%                    | 0%                    | 0%                    |
| Map_rRNA_At   | 0%      | 0%      | 0%      | 0%                    | 0%                    | 0%                    |
| Map_tRNA_Sn   | 0%      | 0%      | 0%      | 0%                    | 0%                    | 0%                    |
| Map_tRNA_At   | 0%      | 0%      | 0%      | 0%                    | 0%                    | 0%                    |
| Map_miRNA_Sn  | 17%     | 22%     | 21%     | 22%                   | 24%                   | 20%                   |
| Map_miRNA_At  | 0%      | 1%      | 0%      | 1%                    | 1%                    | 1%                    |
| Map_un_region | 8%      | 8%      | 7%      | 9%                    | 9%                    | 9%                    |

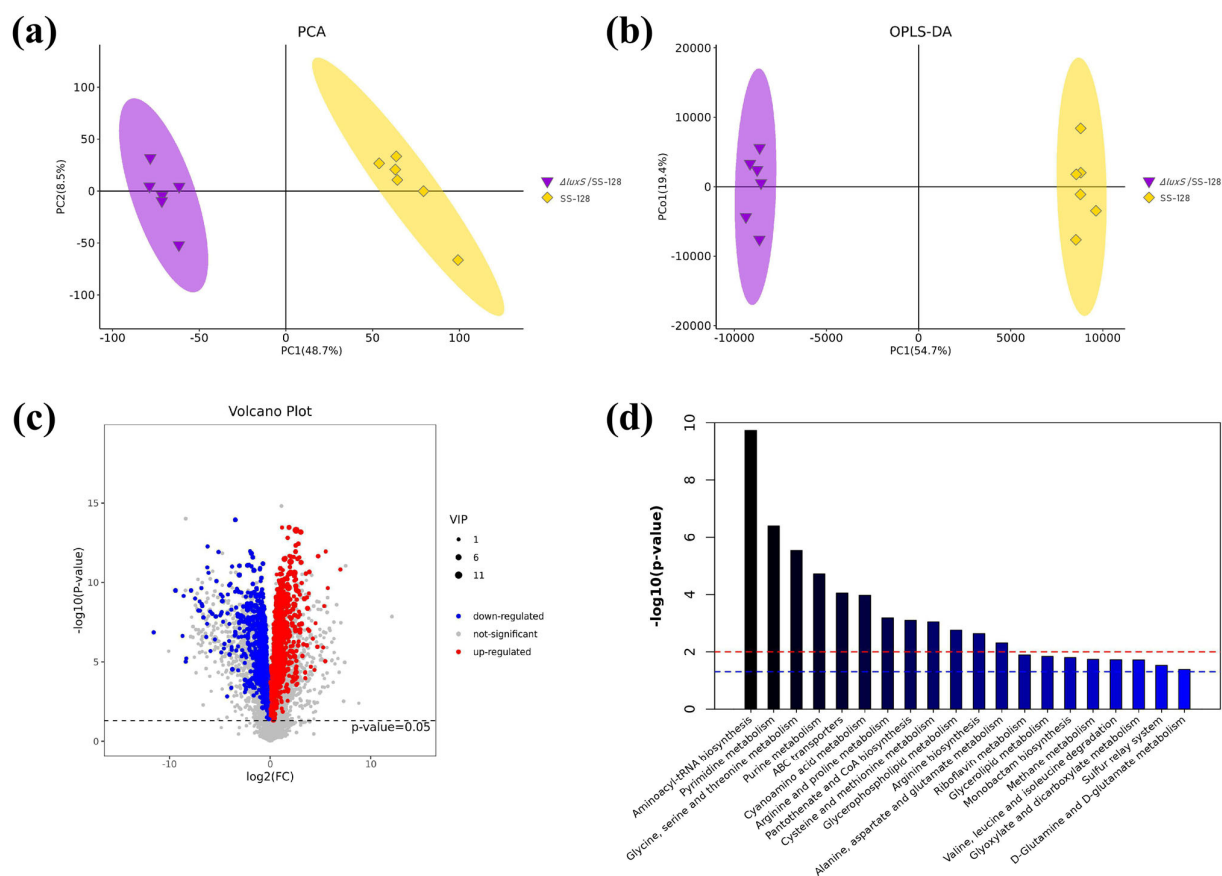

**Figure S1.** Changes in the metabolite contents compared the *luxS* mutant group with the control by LC-MS. The PCA (a), OPLS-DA (b), volcano plot (c) and metabolic pathway enrichment map-Top 20 (d) between  $\Delta luxS/SS-128$  and SS-128 under the cut off of  $P\text{-value} < 0.05$  ( $\Delta luxS/SS-128$  vs SS-128). The red line and blue line in (d) indicate  $P = 0.01$  and  $0.05$ , respectively.
